# Supplementary material
Source: publisher figshare collection journal article supplement (https://diabetesjournals.figshare.com/articles/dataset/_/15124980)
Supplement: Supplementary file 5 [file 3]

## Checklist for Reporting Human Islet Preparations Used in Research

Adapted from Hart NJ, Powers AC (2018) Progress, challenges, and suggestions for using human islets to understand islet biology and human diabetes. Diabetologia <https://doi.org/10.1007/s00125-018-4772-2>.

|                                                                                                                                                                                                                                                                                                                                                                  |                                                  |
|------------------------------------------------------------------------------------------------------------------------------------------------------------------------------------------------------------------------------------------------------------------------------------------------------------------------------------------------------------------|--------------------------------------------------|
| <b>Manuscript DOI:</b> <a href="https://doi.org/10.2337/[DB20-0873]">https://doi.org/10.2337/[DB20-0873]</a> (Example, <a href="https://doi.org/10.2337/db18-1234">https://doi.org/10.2337/db18-1234</a> )                                                                                                                                                       |                                                  |
| <b>Title:</b> ENTPD3 marks mature stem cell derived beta cells formed by self-aggregation <i>in vitro</i>                                                                                                                                                                                                                                                        |                                                  |
| <b>Author list:</b> Fiona M. Docherty <sup>1</sup> , Kent A. Riemony <sup>2</sup> , Roberto Castro-Gutierrez <sup>1</sup> , JaeAnn M. Dwulet <sup>3</sup> , Ali H. Shilleh <sup>1</sup> , Maria S. Hansen <sup>1</sup> , Shane P. M. Williams <sup>1</sup> , Taylor M. Triolo <sup>1</sup> , Richard K. P. Benninger <sup>3</sup> , Holger A. Russ <sup>1#</sup> |                                                  |
| <b>Corresponding author:</b> Holger A. Russ                                                                                                                                                                                                                                                                                                                      | <b>Email address:</b> holger.russ@cuanschutz.edu |

| Islet preparation     | 1                     | 2                     | 3                     | 4    | 5      | 6      | 7 | 8 <sup>a</sup> |
|-----------------------|-----------------------|-----------------------|-----------------------|------|--------|--------|---|----------------|
| MANDATORY INFORMATION |                       |                       |                       |      |        |        |   |                |
| Unique identifier     | RRID:<br>SAMN11476721 | RRID:<br>SAMN11523048 | RRID:<br>SAMN11578544 | R341 | 2296   | 2301   |   |                |
| Donor age (years)     | 50                    | 35                    | 44                    | 42   | 52     | 49     |   |                |
| Donor sex (M/F)       | Male                  | Female                | Female                | Male | Female | Female |   |                |

|                                                                             |                                    |                                    |                                                |                       |                           |                           |  |  |
|-----------------------------------------------------------------------------|------------------------------------|------------------------------------|------------------------------------------------|-----------------------|---------------------------|---------------------------|--|--|
| Donor BMI (kg/m <sup>2</sup> )                                              | 32.80                              | 33.4                               | 38.70                                          | 30                    | 29.2                      | 29.9                      |  |  |
| Donor HbA <sub>1c</sub> or other measure of blood glucose control           | 6.0%                               | 5.4%                               | Average blood glucose levels: 142.20 mg/dl     | Not available         | Not available             | Not available             |  |  |
| Origin/source of islets <sup>b</sup>                                        | IIDP or pancreas                   | IIDP or pancreas                   | IIDP or pancreas                               | University of Alberta | University of Alberta     | University of Alberta     |  |  |
| Islet isolation centre                                                      | The Scharp-Lacy Research Institute | The Scharp-Lacy Research Institute | Southern California Islet Cell Resource Center | ADI Islet Core        | Clinical Islet Laboratory | Clinical Islet Laboratory |  |  |
| Donor history of diabetes? Yes/No                                           | No                                 | No                                 | No                                             | No                    | No                        | No                        |  |  |
| <b>If Yes, complete the next two lines if this information is available</b> |                                    |                                    |                                                |                       |                           |                           |  |  |
| Diabetes duration (years)                                                   |                                    |                                    |                                                |                       |                           |                           |  |  |
| Glucose-lowering therapy at time of death <sup>c</sup>                      |                                    |                                    |                                                |                       |                           |                           |  |  |

| RECOMMENDED INFORMATION |              |        |                        |  |  |  |  |  |
|-------------------------|--------------|--------|------------------------|--|--|--|--|--|
| Donor cause of death    | Anoxic event | Stroke | Cerebrovascular/Stroke |  |  |  |  |  |
| Warm ischaemia time (h) |              |        |                        |  |  |  |  |  |

|                                                                                   |                   |                   |                   |         |         |         |  |  |
|-----------------------------------------------------------------------------------|-------------------|-------------------|-------------------|---------|---------|---------|--|--|
| Cold ischaemia time (h)                                                           |                   |                   |                   |         |         |         |  |  |
| Estimated purity (%)                                                              | 90                | 98                | 75                | 95      | 90      | 30%     |  |  |
| Estimated viability (%)                                                           | 95                | 95                | 95                |         | 89.5    | 82%     |  |  |
| Total culture time (h) <sup>d</sup>                                               | 4 days and 19 hrs | 5 days and 18 hrs | 4 days and 18 hrs | ~4 days | ~5 days | ~3 days |  |  |
| Glucose-stimulated insulin secretion or other functional measurement <sup>e</sup> | none              | none              | none              | none    | none    | none    |  |  |
| Handpicked to purity? Yes/No                                                      | No                | No                | No                | Yes     | No      | No      |  |  |
| Additional notes                                                                  |                   |                   |                   |         |         |         |  |  |

<sup>a</sup>If you have used more than eight islet preparations, please complete additional forms as necessary

<sup>b</sup>For example, IIDP, ECIT, Alberta IsletCore

<sup>c</sup>Please specify the therapy/therapies

<sup>d</sup>Time of islet culture at the isolation centre, during shipment and at the receiving laboratory

<sup>e</sup>Please specify the test and the results
