# Supplementary material
Source: publisher figshare collection journal article supplement (https://diabetesjournals.figshare.com/articles/dataset/_/15124980)

**A**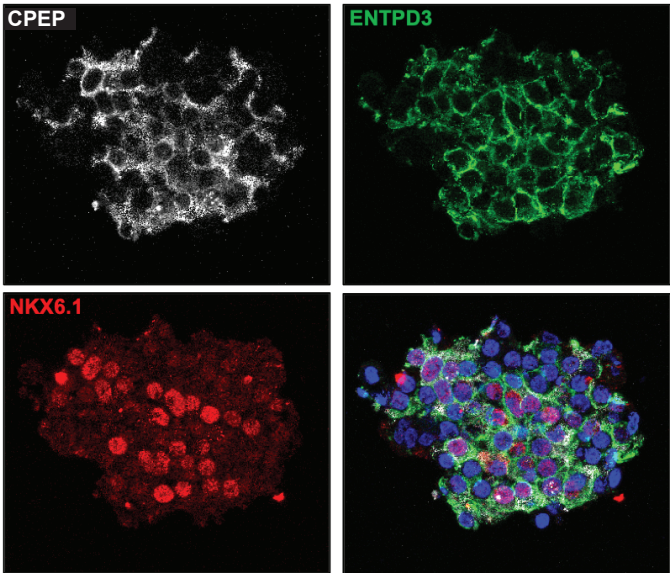**B**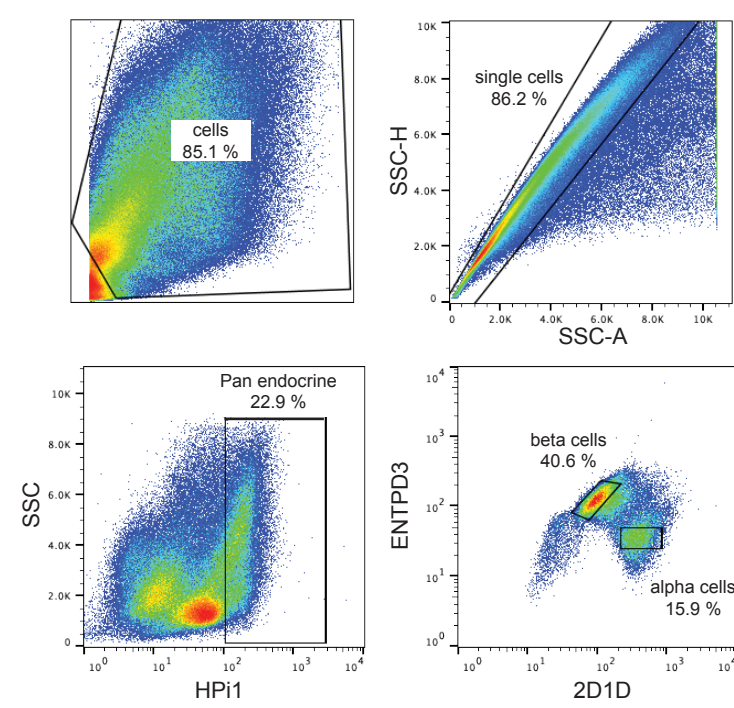**C**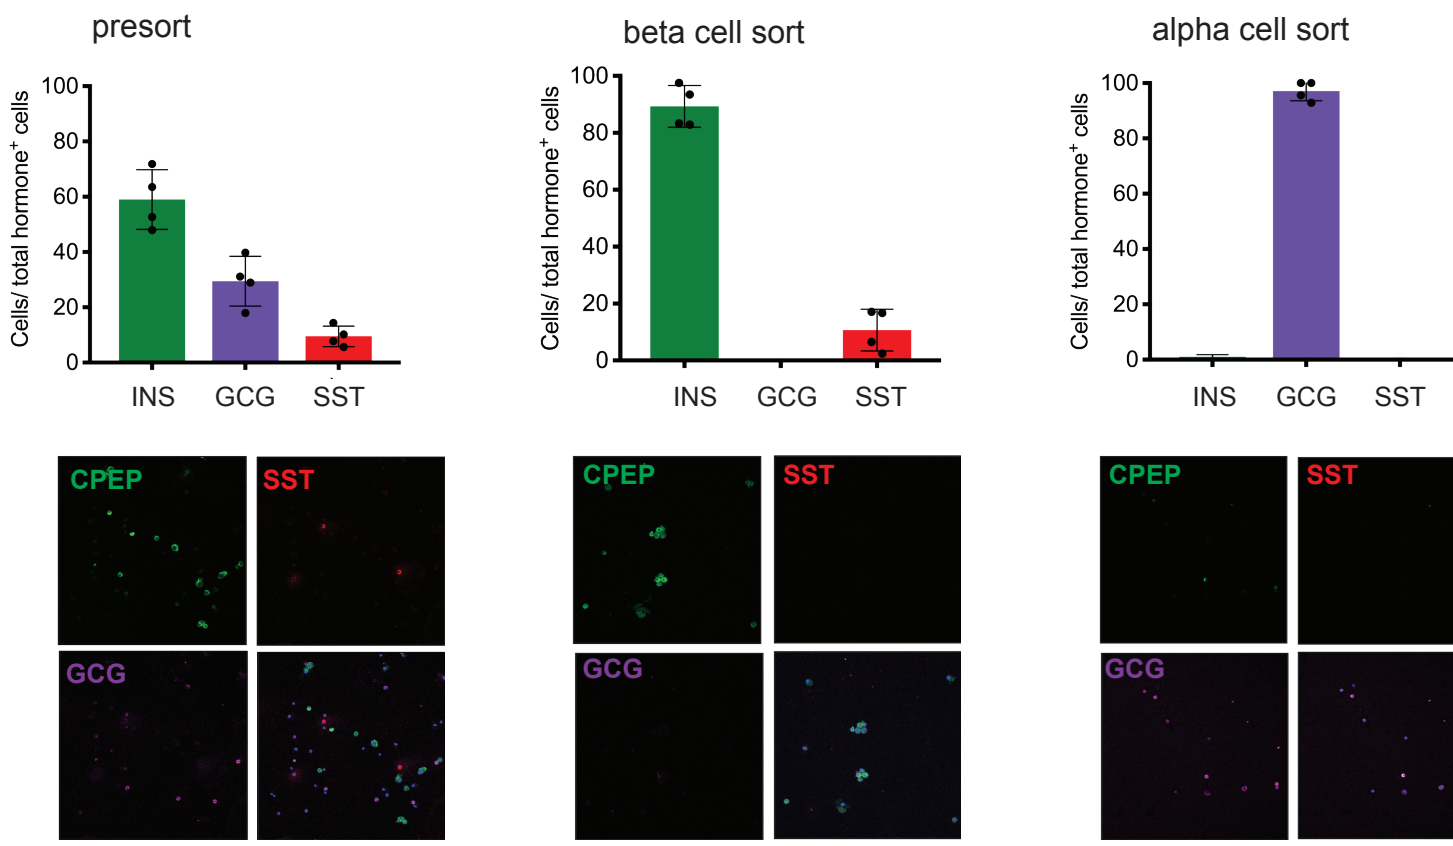**D**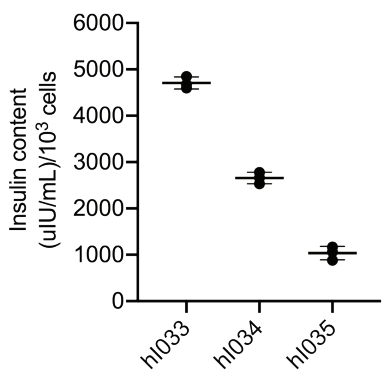**E**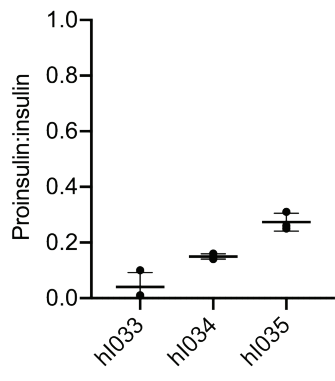**F**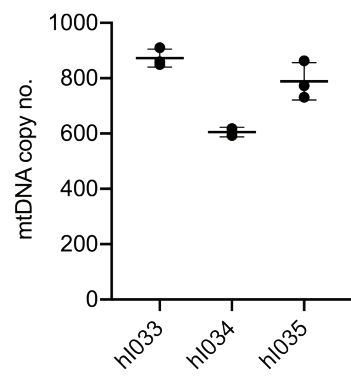**G**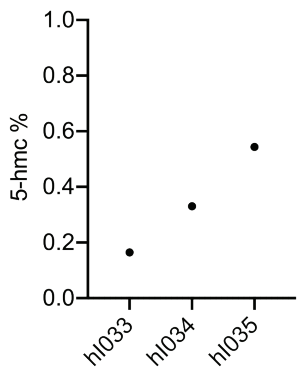

Supplement: Supplementary file 2 [file 3]

**A**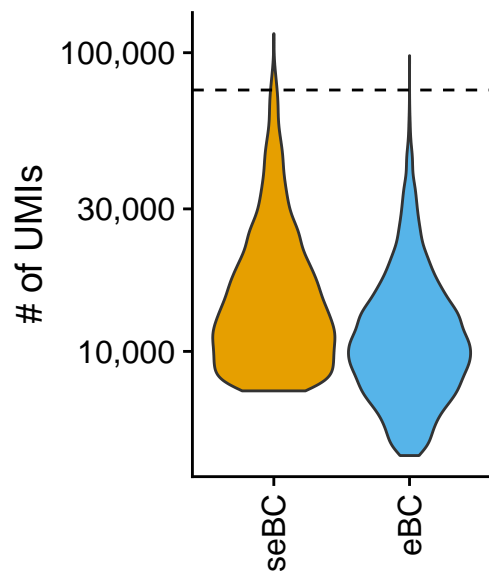**B**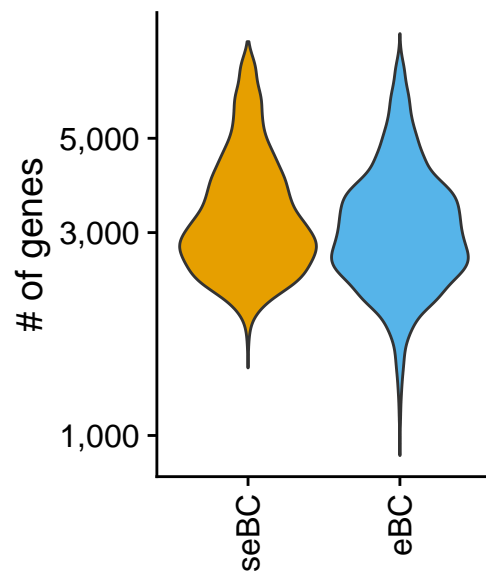**C**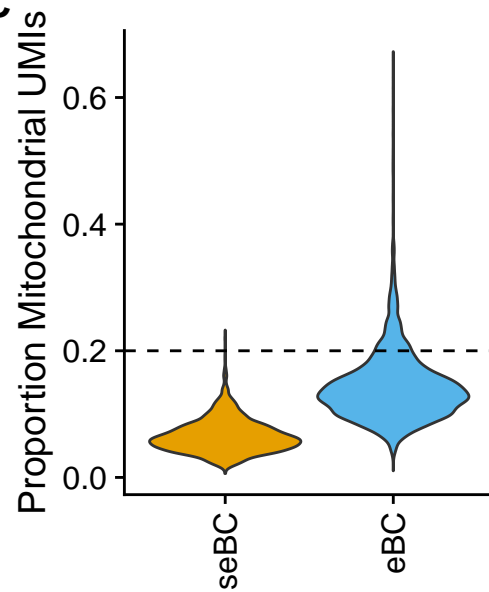**D**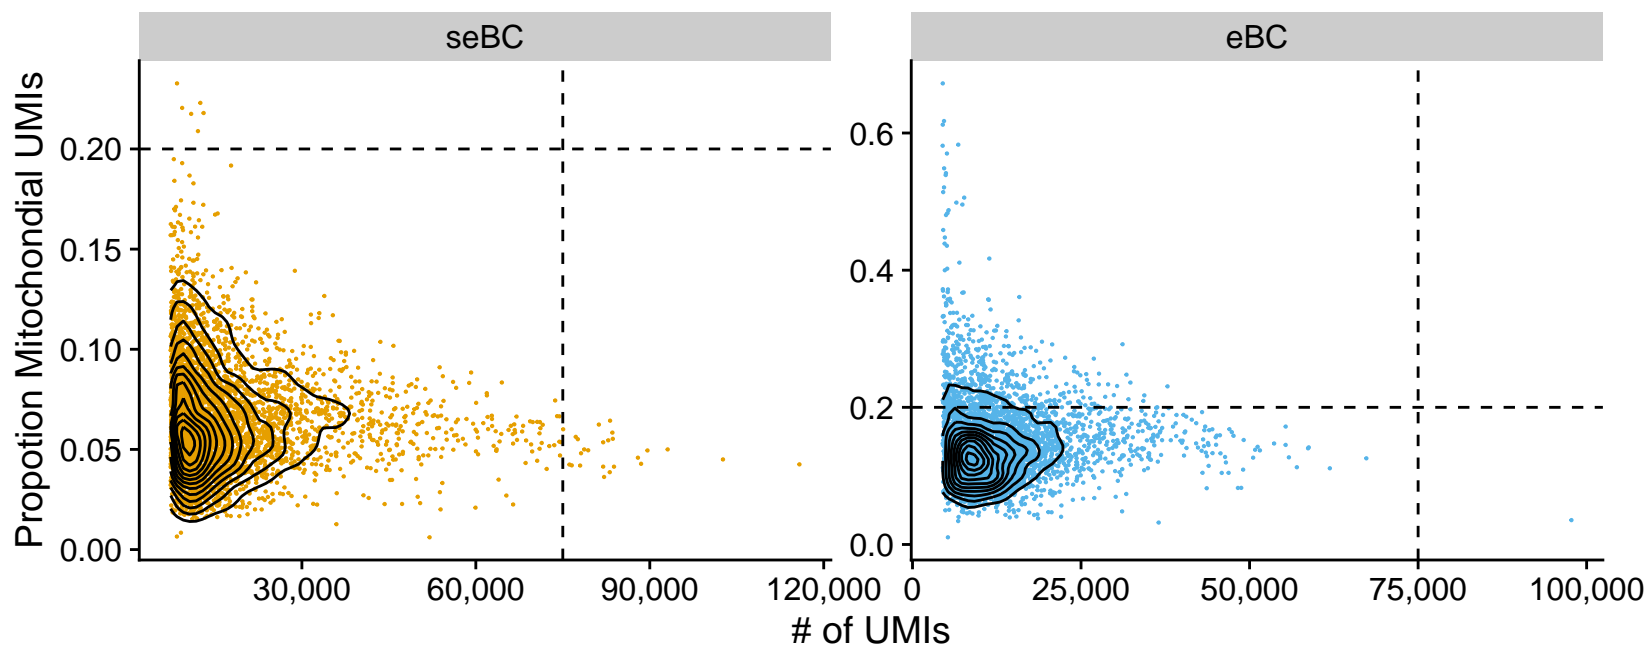

Supplement: Supplementary file 4 [file 3]
